# Supplementary material for: The burden of segregated respiratory diseases in India and the quality of care in these patients: Results from the Asia-Pacific Burden of Respiratory Diseases study
Source: PubMed Central journal article supplement — Lung India. 2016 Nov-Dec;33(6):611–9. doi: 10.4103/0970-2113.192878 (PMC5112817; doi:10.4103/0970-2113.192878), 2016
Supplement: LI-33-611_S1.pdf [file LI-33-611_S1.pdf]

**Supplementary Table 1: Cost of medications by primary diagnosis per month in INR and USD**

|                                     | Primary diagnosis (monthly cost) |                         |               |              |               |            |                      |                      |               |             |
|-------------------------------------|----------------------------------|-------------------------|---------------|--------------|---------------|------------|----------------------|----------------------|---------------|-------------|
|                                     | Allergic rhinitis (INR)          | Allergic rhinitis (USD) | Asthma (INR)  | Asthma (USD) | COPD (INR)    | COPD (USD) | Rhinosinusitis (INR) | Rhinosinusitis (USD) | Total (INR)   | Total (USD) |
| <b>Antibiotic</b>                   |                                  |                         |               |              |               |            |                      |                      |               |             |
| Nmiss                               | 0                                | 0                       | 0             | 0            | 0             | 0          | 0                    | 0                    | 0             | 0           |
| n                                   | 299                              | 299                     | 424           | 424          | 232           | 232        | 45                   | 45                   | 1000          | 1000        |
| Total cost                          | 10,192                           | 167                     | 17,888        | 293          | 9776          | 160        | 1664                 | 27                   | 39,519        | 648         |
| Mean cost per patient (SD)          | 34 (77)                          | 1 (1)                   | 42 (84)       | 1 (1)        | 42 (84)       | 1 (1)      | 37 (80)              | 1 (1)                | 40 (82)       | 1 (1)       |
| Median cost per patient (min, max)  | 0 (0, 208)                       | 0 (0, 3)                | 0 (0, 208)    | 0 (0, 3)     | 0 (0, 208)    | 0 (0, 3)   | 0 (0, 208)           | 0 (0, 3)             | 0 (0, 208)    | 0 (0, 3)    |
| <b>Antitussive</b>                  |                                  |                         |               |              |               |            |                      |                      |               |             |
| Nmiss                               | 0                                | 0                       | 0             | 0            | 0             | 0          | 0                    | 0                    | 0             | 0           |
| n                                   | 299                              | 299                     | 424           | 424          | 232           | 232        | 45                   | 45                   | 1000          | 1000        |
| Total cost                          | 1546                             | 25                      | 5667          | 93           | 5152          | 84         | 0                    | 0                    | 12,365        | 203         |
| Mean cost per patient (SD)          | 5 (51)                           | 0 (1)                   | 13 (82)       | 0 (1)        | 22 (105)      | 0 (2)      | 0 (0)                | 0 (0)                | 12 (79)       | 0 (1)       |
| Median cost per patient (min, max)  | 0 (0, 515)                       | 0 (0, 8)                | 0 (0, 515)    | 0 (0, 8)     | 0 (0, 515)    | 0 (0, 8)   | 0 (0, 0)             | 0 (0, 0)             | 0 (0, 515)    | 0 (0, 8)    |
| <b>Mucolytic</b>                    |                                  |                         |               |              |               |            |                      |                      |               |             |
| Nmiss                               | 0                                | 0                       | 0             | 0            | 0             | 0          | 0                    | 0                    | 0             | 0           |
| n                                   | 299                              | 299                     | 424           | 424          | 232           | 232        | 45                   | 45                   | 1000          | 1000        |
| Total cost                          | 52,864                           | 866                     | 198,240       | 3248         | 383,264       | 6280       | 13,216               | 217                  | 647,584       | 10,611      |
| Mean cost per patient (SD)          | 177 (1521)                       | 3 (25)                  | 468 (2444)    | 8 (40)       | 1652 (4380)   | 27 (72)    | 294 (1970)           | 5 (32)               | 648 (2854)    | 11 (47)     |
| Median cost per patient (min, max)  | 0 (0, 13,216)                    | 0 (0, 217)              | 0 (0, 13,216) | 0 (0, 217)   | 0 (0, 13,216) | 0 (0, 217) | 0 (0, 13,216)        | 0 (0, 217)           | 0 (0, 13,216) | 0 (0, 217)  |
| <b>Saline (irrigation or spray)</b> |                                  |                         |               |              |               |            |                      |                      |               |             |
| Nmiss                               | 0                                | 0                       | 0             | 0            | 0             | 0          | 0                    | 0                    | 0             | 0           |
| n                                   | 299                              | 299                     | 424           | 424          | 232           | 232        | 45                   | 45                   | 1000          | 1000        |
| Total cost                          | 0                                | 0                       | 272           | 4            | 0             | 0          | 0                    | 0                    | 272           | 4           |
| Mean cost per patient (SD)          | 0 (0)                            | 0 (0)                   | 1 (13)        | 0 (0)        | 0 (0)         | 0 (0)      | 0 (0)                | 0 (0)                | 0 (9)         | 0 (0)       |
| Median cost per patient (min, max)  | 0 (0, 0)                         | 0 (0, 0)                | 0 (0, 272)    | 0 (0, 4)     | 0 (0, 0)      | 0 (0, 0)   | 0 (0, 0)             | 0 (0, 0)             | 0 (0, 272)    | 0 (0, 4)    |
| <b>Painkiller</b>                   |                                  |                         |               |              |               |            |                      |                      |               |             |
| Nmiss                               | 0                                | 0                       | 0             | 0            | 0             | 0          | 0                    | 0                    | 0             | 0           |
| n                                   | 299                              | 299                     | 424           | 424          | 232           | 232        | 45                   | 45                   | 1000          | 1000        |
| Total cost                          | 252                              | 4                       | 84            | 1            | 336           | 6          | 336                  | 6                    | 1008          | 17          |
| Mean cost per patient (SD)          | 1 (8)                            | 0 (0)                   | 0 (4)         | 0 (0)        | 1 (11)        | 0 (0)      | 7 (24)               | 0 (0)                | 1 (9)         | 0 (0)       |
| Median cost per patient (min, max)  | 0 (0, 84)                        | 0 (0, 1)                | 0 (0, 84)     | 0 (0, 1)     | 0 (0, 84)     | 0 (0, 1)   | 0 (0, 84)            | 0 (0, 1)             | 0 (0, 84)     | 0 (0, 1)    |
| <b>Oral antihistamine</b>           |                                  |                         |               |              |               |            |                      |                      |               |             |
| Nmiss                               | 0                                | 0                       | 0             | 0            | 0             | 0          | 0                    | 0                    | 0             | 0           |
| n                                   | 299                              | 299                     | 424           | 424          | 232           | 232        | 45                   | 45                   | 1000          | 1000        |
| Total cost                          | 3094                             | 51                      | 2022          | 33           | 627           | 10         | 445                  | 7                    | 6188          | 101         |
| Mean cost per patient (SD)          | 10 (10)                          | 0 (0)                   | 5 (9)         | 0 (0)        | 3 (7)         | 0 (0)      | 10 (10)              | 0 (0)                | 6 (9)         | 0 (0)       |
| Median cost per patient (min, max)  | 20 (0, 20)                       | 0 (0, 0)                | 0 (0, 20)     | 0 (0, 0)     | 0 (0, 20)     | 0 (0, 0)   | 0 (0, 20)            | 0 (0, 0)             | 0 (0, 20)     | 0 (0, 0)    |
| <b>Oral corticosteroid</b>          |                                  |                         |               |              |               |            |                      |                      |               |             |
| Nmiss                               | 0                                | 0                       | 0             | 0            | 0             | 0          | 0                    | 0                    | 0             | 0           |
| n                                   | 299                              | 299                     | 424           | 424          | 232           | 232        | 45                   | 45                   | 1000          | 1000        |
| Total cost                          | 306                              | 5                       | 2100          | 34           | 1540          | 25         | 0                    | 0                    | 3946          | 65          |
| Mean cost per patient (SD)          | 1 (8)                            | 0 (0)                   | 5 (26)        | 0 (0)        | 7 (30)        | 0 (0)      | 0 (0)                | 0 (0)                | 4 (23)        | 0 (0)       |
| Median cost per patient (min, max)  | 0 (0, 61)                        | 0 (0, 1)                | 0 (0, 140)    | 0 (0, 2)     | 0 (0, 140)    | 0 (0, 2)   | 0 (0, 0)             | 0 (0, 0)             | 0 (0, 140)    | 0 (0, 2)    |
| <b>Oral decongestant</b>            |                                  |                         |               |              |               |            |                      |                      |               |             |
| Nmiss                               | 0                                | 0                       | 0             | 0            | 0             | 0          | 0                    | 0                    | 0             | 0           |
| n                                   | 299                              | 299                     | 424           | 424          | 232           | 232        | 45                   | 45                   | 1000          | 1000        |
| Total cost                          | 1804                             | 30                      | 395           | 6            | 56            | 1          | 733                  | 12                   | 2987          | 49          |
| Mean cost per patient (SD)          | 6 (17)                           | 0 (0)                   | 1 (7)         | 0 (0)        | 0 (4)         | 0 (0)      | 16 (26)              | 0 (0)                | 3 (13)        | 0 (0)       |
| Median cost per patient (min, max)  | 0 (0, 56)                        | 0 (0, 1)                | 0 (0, 56)     | 0 (0, 1)     | 0 (0, 56)     | 0 (0, 1)   | 0 (0, 56)            | 0 (0, 1)             | 0 (0, 56)     | 0 (0, 1)    |

Contd...

**Supplementary Table 1: Contd...**

|                                    | Primary diagnosis (monthly cost) |                         |              |              |            |            |                      |                      |             |             |
|------------------------------------|----------------------------------|-------------------------|--------------|--------------|------------|------------|----------------------|----------------------|-------------|-------------|
|                                    | Allergic rhinitis (INR)          | Allergic rhinitis (USD) | Asthma (INR) | Asthma (USD) | COPD (INR) | COPD (USD) | Rhinosinusitis (INR) | Rhinosinusitis (USD) | Total (INR) | Total (USD) |
| Oral beta agonist                  |                                  |                         |              |              |            |            |                      |                      |             |             |
| Nmiss                              | 0                                | 0                       | 0            | 0            | 0          | 0          | 0                    | 0                    | 0           | 0           |
| n                                  | 299                              | 299                     | 424          | 424          | 232        | 232        | 45                   | 45                   | 1000        | 1000        |
| Total cost                         | 134                              | 2                       | 2150         | 35           | 2083       | 34         | 0                    | 0                    | 4368        | 72          |
| Mean cost per patient (SD)         | 0(5)                             | 0(0)                    | 5(18)        | 0(0)         | 9(23)      | 0(0)       | 0(0)                 | 0(0)                 | 4(17)       | 0(0)        |
| Median cost per patient (min, max) | 0(0, 67)                         | 0(0, 1)                 | 0(0, 67)     | 0(0, 1)      | 0(0, 67)   | 0(0, 1)    | 0(0, 0)              | 0(0, 0)              | 0(0, 67)    | 0(0, 1)     |
| LTRA                               |                                  |                         |              |              |            |            |                      |                      |             |             |
| Nmiss                              | 0                                | 0                       | 0            | 0            | 0          | 0          | 0                    | 0                    | 0           | 0           |
| n                                  | 299                              | 299                     | 424          | 424          | 232        | 232        | 45                   | 45                   | 1000        | 1000        |
| Total cost                         | 96,600                           | 1583                    | 105,800      | 1734         | 59,800     | 980        | 20,700               | 339                  | 282,900     | 4636        |
| Mean cost per patient (SD)         | 323(801)                         | 5(13)                   | 250(716)     | 4(12)        | 258(727)   | 4(12)      | 460(930)             | 8(15)                | 283(756)    | 5(12)       |
| Median cost per patient (min, max) | 0(0, 2300)                       | 0(0, 38)                | 0(0, 2300)   | 0(0, 38)     | 0(0, 2300) | 0(0, 38)   | 0(0, 2300)           | 0(0, 38)             | 0(0, 2300)  | 0(0, 38)    |
| Intranasal antihistamine           |                                  |                         |              |              |            |            |                      |                      |             |             |
| Nmiss                              | 0                                | 0                       | 0            | 0            | 0          | 0          | 0                    | 0                    | 0           | 0           |
| n                                  | 299                              | 299                     | 424          | 424          | 232        | 232        | 45                   | 45                   | 1000        | 1000        |
| Total cost                         | 207                              | 3                       | 1658         | 27           | 622        | 10         | 0                    | 0                    | 2486        | 41          |
| Mean cost per patient (SD)         | 1(12)                            | 0(0)                    | 4(28)        | 0(0)         | 3(23)      | 0(0)       | 0(0)                 | 0(0)                 | 2(23)       | 0(0)        |
| Median cost per patient (min, max) | 0(0, 207)                        | 0(0, 3)                 | 0(0, 207)    | 0(0, 3)      | 0(0, 207)  | 0(0, 3)    | 0(0, 0)              | 0(0, 0)              | 0(0, 207)   | 0(0, 3)     |
| Intranasal decongestant            |                                  |                         |              |              |            |            |                      |                      |             |             |
| Nmiss                              | 0                                | 0                       | 0            | 0            | 0          | 0          | 0                    | 0                    | 0           | 0           |
| n                                  | 299                              | 299                     | 424          | 424          | 232        | 232        | 45                   | 45                   | 1000        | 1000        |
| Total cost                         | 32                               | 1                       | 21           | 0            | 11         | 0          | 0                    | 0                    | 63          | 1           |
| Mean cost per patient (SD)         | 0(1)                             | 0(0)                    | 0(1)         | 0(0)         | 0(1)       | 0(0)       | 0(0)                 | 0(0)                 | 0(1)        | 0(0)        |
| Median cost per patient (min, max) | 0(0, 11)                         | 0(0, 0)                 | 0(0, 11)     | 0(0, 0)      | 0(0, 11)   | 0(0, 0)    | 0(0, 0)              | 0(0, 0)              | 0(0, 11)    | 0(0, 0)     |
| Steroidal nasal spray              |                                  |                         |              |              |            |            |                      |                      |             |             |
| Nmiss                              | 0                                | 0                       | 0            | 0            | 0          | 0          | 0                    | 0                    | 0           | 0           |
| n                                  | 299                              | 299                     | 424          | 424          | 232        | 232        | 45                   | 45                   | 1000        | 1000        |
| Total cost                         | 12,846                           | 211                     | 12,846       | 211          | 2694       | 44         | 207                  | 3                    | 28,594      | 469         |
| Mean cost per patient (SD)         | 43(84)                           | 1(1)                    | 30(73)       | 0(1)         | 12(48)     | 0(1)       | 5(31)                | 0(1)                 | 29(71)      | 0(1)        |
| Median cost per patient (min, max) | 0(0, 207)                        | 0(0, 3)                 | 0(0, 207)    | 0(0, 3)      | 0(0, 207)  | 0(0, 3)    | 0(0, 207)            | 0(0, 3)              | 0(0, 207)   | 0(0, 3)     |
| Intravenous corticosteroid         |                                  |                         |              |              |            |            |                      |                      |             |             |
| Nmiss                              | 0                                | 0                       | 0            | 0            | 0          | 0          | 0                    | 0                    | 0           | 0           |
| n                                  | 299                              | 299                     | 424          | 424          | 232        | 232        | 45                   | 45                   | 1000        | 1000        |
| Total cost                         | 0                                | 0                       | 0            | 0            | 7280       | 119        | 0                    | 0                    | 7280        | 119         |
| Mean cost per patient (SD)         | 0(0)                             | 0(0)                    | 0(0)         | 0(0)         | 31(337)    | 1(6)       | 0(0)                 | 0(0)                 | 7(163)      | 0(3)        |
| Median cost per patient (min, max) | 0(0, 0)                          | 0(0, 0)                 | 0(0, 0)      | 0(0, 0)      | 0(0, 3640) | 0(0, 60)   | 0(0, 0)              | 0(0, 0)              | 0(0, 3640)  | 0(0, 60)    |
| ICS                                |                                  |                         |              |              |            |            |                      |                      |             |             |
| Nmiss                              | 0                                | 0                       | 0            | 0            | 0          | 0          | 0                    | 0                    | 0           | 0           |
| n                                  | 299                              | 299                     | 424          | 424          | 232        | 232        | 45                   | 45                   | 1000        | 1000        |
| Total cost                         | 4468                             | 73                      | 11,373       | 186          | 7718       | 126        | 0                    | 0                    | 23,559      | 386         |
| Mean cost per patient (SD)         | 15(53)                           | 0(1)                    | 27(69)       | 0(1)         | 33(75)     | 1(1)       | 0(0)                 | 0(0)                 | 24(65)      | 0(1)        |
| Median cost per patient (min, max) | 0(0, 203)                        | 0(0, 3)                 | 0(0, 203)    | 0(0, 3)      | 0(0, 203)  | 0(0, 3)    | 0(0, 0)              | 0(0, 0)              | 0(0, 203)   | 0(0, 3)     |
| Inhaled anticholinergic            |                                  |                         |              |              |            |            |                      |                      |             |             |
| Nmiss                              | 0                                | 0                       | 0            | 0            | 0          | 0          | 0                    | 0                    | 0           | 0           |
| n                                  | 299                              | 299                     | 424          | 424          | 232        | 232        | 45                   | 45                   | 1000        | 1000        |
| Total cost                         | 480                              | 8                       | 2559         | 42           | 3998       | 66         | 0                    | 0                    | 7037        | 115         |
| Mean cost per patient (SD)         | 2(16)                            | 0(0)                    | 6(31)        | 0(0)         | 17(50)     | 0(1)       | 0(0)                 | 0(0)                 | 7(33)       | 0(1)        |
| Median cost per patient (min, max) | 0(0, 160)                        | 0(0, 3)                 | 0(0, 160)    | 0(0, 3)      | 0(0, 160)  | 0(0, 3)    | 0(0, 0)              | 0(0, 0)              | 0(0, 160)   | 0(0, 3)     |

Contd...

**Supplementary Table 1: Contd...**

|                                           | Primary diagnosis (monthly cost) |                         |              |              |            |            |                      |                      |             |             |
|-------------------------------------------|----------------------------------|-------------------------|--------------|--------------|------------|------------|----------------------|----------------------|-------------|-------------|
|                                           | Allergic rhinitis (INR)          | Allergic rhinitis (USD) | Asthma (INR) | Asthma (USD) | COPD (INR) | COPD (USD) | Rhinosinusitis (INR) | Rhinosinusitis (USD) | Total (INR) | Total (USD) |
| Inhaled SABA                              |                                  |                         |              |              |            |            |                      |                      |             |             |
| Nmiss                                     | 0                                | 0                       | 0            | 0            | 0          | 0          | 0                    | 0                    | 0           | 0           |
| n                                         | 299                              | 299                     | 424          | 424          | 232        | 232        | 45                   | 45                   | 1000        | 1000        |
| Total cost                                | 1725                             | 28                      | 3826         | 63           | 1599       | 26         | 0                    | 0                    | 7150        | 117         |
| Mean cost per patient (SD)                | 6 (12)                           | 0 (0)                   | 9 (14)       | 0 (0)        | 7 (13)     | 0 (0)      | 0 (0)                | 0 (0)                | 7 (13)      | 0 (0)       |
| Median cost per patient (min, max)        | 0 (0, 31)                        | 0 (0, 1)                | 0 (0, 31)    | 0 (0, 1)     | 0 (0, 31)  | 0 (0, 1)   | 0 (0, 0)             | 0 (0, 0)             | 0 (0, 31)   | 0 (0, 1)    |
| Inhaled LABA                              |                                  |                         |              |              |            |            |                      |                      |             |             |
| Nmiss                                     | 0                                | 0                       | 0            | 0            | 0          | 0          | 0                    | 0                    | 0           | 0           |
| n                                         | 299                              | 299                     | 424          | 424          | 232        | 232        | 45                   | 45                   | 1000        | 1000        |
| Total cost                                | 6354                             | 104                     | 12,432       | 204          | 4558       | 75         | 0                    | 0                    | 23,345      | 383         |
| Mean cost per patient (SD)                | 21 (50)                          | 0 (1)                   | 29 (57)      | 0 (1)        | 20 (48)    | 0 (1)      | 0 (0)                | 0 (0)                | 23 (52)     | 0 (1)       |
| Median cost per patient (min, max)        | 0 (0, 138)                       | 0 (0, 2)                | 0 (0, 138)   | 0 (0, 2)     | 0 (0, 138) | 0 (0, 2)   | 0 (0, 0)             | 0 (0, 0)             | 0 (0, 138)  | 0 (0, 2)    |
| Fixed dose combination inhaler (ICS+LABA) |                                  |                         |              |              |            |            |                      |                      |             |             |
| Nmiss                                     | 0                                | 0                       | 0            | 0            | 0          | 0          | 0                    | 0                    | 0           | 0           |
| n                                         | 299                              | 299                     | 424          | 424          | 232        | 232        | 45                   | 45                   | 1000        | 1000        |
| Total cost                                | 3241                             | 53                      | 21,281       | 349          | 14,234     | 233        | 0                    | 0                    | 38,757      | 635         |
| Mean cost per patient (SD)                | 11 (38)                          | 0 (1)                   | 50 (68)      | 1 (1)        | 61 (70)    | 1 (1)      | 0 (0)                | 0 (0)                | 39 (63)     | 1 (1)       |
| Median cost per patient (min, max)        | 0 (0, 141)                       | 0 (0, 2)                | 0 (0, 141)   | 0 (0, 2)     | 0 (0, 141) | 0 (0, 2)   | 0 (0, 0)             | 0 (0, 0)             | 0 (0, 141)  | 0 (0, 2)    |
| Other combination inhaler                 |                                  |                         |              |              |            |            |                      |                      |             |             |
| Nmiss                                     | 0                                | 0                       | 0            | 0            | 0          | 0          | 0                    | 0                    | 0           | 0           |
| n                                         | 299                              | 299                     | 424          | 424          | 232        | 232        | 45                   | 45                   | 1000        | 1000        |
| Total cost                                | 261                              | 4                       | 3914         | 64           | 5219       | 86         | 0                    | 0                    | 9395        | 154         |
| Mean cost per patient (SD)                | 1 (15)                           | 0 (0)                   | 9 (48)       | 0 (1)        | 22 (73)    | 0 (1)      | 0 (0)                | 0 (0)                | 9 (49)      | 0 (1)       |
| Median cost per patient (min, max)        | 0 (0, 261)                       | 0 (0, 4)                | 0 (0, 261)   | 0 (0, 4)     | 0 (0, 261) | 0 (0, 4)   | 0 (0, 0)             | 0 (0, 0)             | 0 (0, 261)  | 0 (0, 4)    |
| Nebulized bronchodilator                  |                                  |                         |              |              |            |            |                      |                      |             |             |
| Nmiss                                     | 0                                | 0                       | 0            | 0            | 0          | 0          | 0                    | 0                    | 0           | 0           |
| n                                         | 299                              | 299                     | 424          | 424          | 232        | 232        | 45                   | 45                   | 1000        | 1000        |
| Total cost                                | 21                               | 0                       | 62           | 1            | 62         | 1          | 4                    | 0                    | 148         | 2           |
| Mean cost per patient (SD)                | 0 (1)                            | 0 (0)                   | 0 (1)        | 0 (0)        | 0 (1)      | 0 (0)      | 0 (1)                | 0 (0)                | 0 (1)       | 0 (0)       |
| Median cost per patient (min, max)        | 0 (0, 4)                         | 0 (0, 0)                | 0 (0, 4)     | 0 (0, 0)     | 0 (0, 4)   | 0 (0, 0)   | 0 (0, 4)             | 0 (0, 0)             | 0 (0, 4)    | 0 (0, 0)    |
| Nebulized steroid                         |                                  |                         |              |              |            |            |                      |                      |             |             |
| Nmiss                                     | 0                                | 0                       | 0            | 0            | 0          | 0          | 0                    | 0                    | 0           | 0           |
| n                                         | 299                              | 299                     | 424          | 424          | 232        | 232        | 45                   | 45                   | 1000        | 1000        |
| Total cost                                | 0                                | 0                       | 616          | 10           | 1078       | 18         | 0                    | 0                    | 1694        | 28          |
| Mean cost per patient (SD)                | 0 (0)                            | 0 (0)                   | 1 (15)       | 0 (0)        | 5 (26)     | 0 (0)      | 0 (0)                | 0 (0)                | 2 (16)      | 0 (0)       |
| Median cost per patient (min, max)        | 0 (0, 0)                         | 0 (0, 0)                | 0 (0, 154)   | 0 (0, 3)     | 0 (0, 154) | 0 (0, 3)   | 0 (0, 0)             | 0 (0, 0)             | 0 (0, 154)  | 0 (0, 3)    |
| Methylxanthine                            |                                  |                         |              |              |            |            |                      |                      |             |             |
| Nmiss                                     | 0                                | 0                       | 0            | 0            | 0          | 0          | 0                    | 0                    | 0           | 0           |
| n                                         | 299                              | 299                     | 424          | 424          | 232        | 232        | 45                   | 45                   | 1000        | 1000        |
| Total cost                                | 0                                | 0                       | 616          | 10           | 1078       | 18         | 0                    | 0                    | 1694        | 28          |
| Mean cost per patient (SD)                | 0 (0)                            | 0 (0)                   | 1 (15)       | 0 (0)        | 5 (26)     | 0 (0)      | 0 (0)                | 0 (0)                | 2 (16)      | 0 (0)       |
| Median cost per patient (min, max)        | 0 (0, 0)                         | 0 (0, 0)                | 0 (0, 154)   | 0 (0, 3)     | 0 (0, 154) | 0 (0, 3)   | 0 (0, 0)             | 0 (0, 0)             | 0 (0, 154)  | 0 (0, 3)    |
| Methylxanthine                            |                                  |                         |              |              |            |            |                      |                      |             |             |
| Nmiss                                     | 0                                | 0                       | 0            | 0            | 0          | 0          | 0                    | 0                    | 0           | 0           |
| n                                         | 299                              | 299                     | 424          | 424          | 232        | 232        | 45                   | 45                   | 1000        | 1000        |
| Total cost                                | 504                              | 8                       | 9198         | 151          | 9954       | 163        | 126                  | 2                    | 19,782      | 324         |
| Mean cost per patient (SD)                | 2 (14)                           | 0 (0)                   | 22 (48)      | 0 (1)        | 43 (60)    | 1 (1)      | 3 (19)               | 0 (0)                | 20 (46)     | 0 (1)       |
| Median cost per patient (min, max)        | 0 (0, 126)                       | 0 (0, 2)                | 0 (0, 126)   | 0 (0, 2)     | 0 (0, 126) | 0 (0, 2)   | 0 (0, 126)           | 0 (0, 2)             | 0 (0, 126)  | 0 (0, 2)    |
| Intravenous IgE antibody (e.g., Xolair)   |                                  |                         |              |              |            |            |                      |                      |             |             |
| Nmiss                                     | 0                                | 0                       | 0            | 0            | 0          | 0          | 0                    | 0                    | 0           | 0           |
| n                                         | 299                              | 299                     | 424          | 424          | 232        | 232        | 45                   | 45                   | 1000        | 1000        |
| Total cost                                | 0                                | 0                       | 0            | 0            | 0          | 0          | 0                    | 0                    | 0           | 0           |

Contd...

**Supplementary Table 1: Contd...**

|                                    | Primary diagnosis (monthly cost) |                         |                 |              |                 |            |                      |                      |                 |             |
|------------------------------------|----------------------------------|-------------------------|-----------------|--------------|-----------------|------------|----------------------|----------------------|-----------------|-------------|
|                                    | Allergic rhinitis (INR)          | Allergic rhinitis (USD) | Asthma (INR)    | Asthma (USD) | COPD (INR)      | COPD (USD) | Rhinosinusitis (INR) | Rhinosinusitis (USD) | Total (INR)     | Total (USD) |
| Mean cost per patient (SD)         | 0 (0)                            | 0 (0)                   | 0 (0)           | 0 (0)        | 0 (0)           | 0 (0)      | 0 (0)                | 0 (0)                | 0 (0)           | 0 (0)       |
| Median cost per patient (min, max) | 0 (0, 0)                         | 0 (0, 0)                | 0 (0, 0)        | 0 (0, 0)     | 0 (0, 0)        | 0 (0, 0)   | 0 (0, 0)             | 0 (0, 0)             | 0 (0, 0)        | 0 (0, 0)    |
| Immunotherapy                      |                                  |                         |                 |              |                 |            |                      |                      |                 |             |
| Nmiss                              | 0                                | 0                       | 0               | 0            | 0               | 0          | 0                    | 0                    | 0               | 0           |
| n                                  | 299                              | 299                     | 424             | 424          | 232             | 232        | 45                   | 45                   | 1000            | 1000        |
| Total cost                         | 0                                | 0                       | 0               | 0            | 0               | 0          | 0                    | 0                    | 0               | 0           |
| Mean cost per patient (SD)         | 0 (0)                            | 0 (0)                   | 0 (0)           | 0 (0)        | 0 (0)           | 0 (0)      | 0 (0)                | 0 (0)                | 0 (0)           | 0 (0)       |
| Median cost per patient (min, max) | 0 (0, 0)                         | 0 (0, 0)                | 0 (0, 0)        | 0 (0, 0)     | 0 (0, 0)        | 0 (0, 0)   | 0 (0, 0)             | 0 (0, 0)             | 0 (0, 0)        | 0 (0, 0)    |
| Alternative/traditional medicine   |                                  |                         |                 |              |                 |            |                      |                      |                 |             |
| Nmiss                              | 68                               | 68                      | 13              | 13           | 3               | 3          | 13                   | 13                   | 97              | 97          |
| n                                  | 231                              | 231                     | 411             | 411          | 229             | 229        | 32                   | 32                   | 903             | 903         |
| Total cost                         | 0                                | 0                       | 0               | 0            | 0               | 0          | 0                    | 0                    | 0               | 0           |
| Mean cost per patient (SD)         | 0 (0)                            | 0 (0)                   | 0 (0)           | 0 (0)        | 0 (0)           | 0 (0)      | 0 (0)                | 0 (0)                | 0 (0)           | 0 (0)       |
| Median cost per patient (min, max) | 0 (0, 0)                         | 0 (0, 0)                | 0 (0, 0)        | 0 (0, 0)     | 0 (0, 0)        | 0 (0, 0)   | 0 (0, 0)             | 0 (0, 0)             | 0 (0, 0)        | 0 (0, 0)    |
| Other                              |                                  |                         |                 |              |                 |            |                      |                      |                 |             |
| Nmiss                              | 43                               | 43                      | 57              | 57           | 43              | 43         | 9                    | 9                    | 152             | 152         |
| n                                  | 256                              | 256                     | 367             | 367          | 189             | 189        | 36                   | 36                   | 848             | 848         |
| Total cost                         | 0                                | 0                       | 0               | 0            | 0               | 0          | 0                    | 0                    | 0               | 0           |
| Mean cost per patient (SD)         | 0 (0)                            | 0 (0)                   | 0 (0)           | 0 (0)        | 0 (0)           | 0 (0)      | 0 (0)                | 0 (0)                | 0 (0)           | 0 (0)       |
| Median cost per patient (min, max) | 0 (0, 0)                         | 0 (0, 0)                | 0 (0, 0)        | 0 (0, 0)     | 0 (0, 0)        | 0 (0, 0)   | 0 (0, 0)             | 0 (0, 0)             | 0 (0, 0)        | 0 (0, 0)    |
| Total medication cost <sup>a</sup> |                                  |                         |                 |              |                 |            |                      |                      |                 |             |
| Nmiss                              | 0                                | 0                       | 0               | 0            | 0               | 0          | 0                    | 0                    | 0               | 0           |
| n                                  | 299                              | 299                     | 424             | 424          | 232             | 232        | 45                   | 45                   | 1000            | 1000        |
| Total cost                         | 196,930                          | 3227                    | 414,404         | 6790         | 521,661         | 8548       | 37,431               | 613                  | 1,170,426       | 19,179      |
| Mean cost per patient (SD)         | 659 (1780)                       | 11 (29)                 | 977 (2696)      | 16 (44)      | 2249 (4647)     | 37 (76)    | 832 (2447)           | 14 (40)              | 1170 (3106)     | 19 (51)     |
| Median cost per patient (min, max) | 77 (0, 15,516)                   | 1 (0, 254)              | 207 (0, 16,146) | 3 (0, 265)   | 339 (0, 20,209) | 6 (0, 331) | 77 (0, 15,744)       | 1 (0, 258)           | 198 (0, 20,209) | 3 (0, 331)  |

<sup>a</sup>Total medication cost for a patient is the sum of all nonmissing amounts. COPD: Chronic obstructive pulmonary condition, Min: Minimum, Max: Maximum, SD: Standard deviation, LABA: Long acting beta agonist, SABA: Short acting beta agonist, ICS: Inhaled corticosteroid, LTRA: Leukotriene receptor antagonist
