# Supplementary material for: The burden of segregated respiratory diseases in India and the quality of care in these patients: Results from the Asia-Pacific Burden of Respiratory Diseases study
Source: PubMed Central journal article supplement — Lung India. 2016 Nov-Dec;33(6):611–9. doi: 10.4103/0970-2113.192878 (PMC5112817; doi:10.4103/0970-2113.192878), 2016
Supplement: LI-33-611_S2.pdf [file LI-33-611_S2.pdf]

**Supplementary Table 2: Cost of healthcare resource use by primary diagnosis per month in INR and USD**

|                                                          | Primary diagnosis (monthly cost) |                         |                   |              |                   |            |                      |                      |                   |             |
|----------------------------------------------------------|----------------------------------|-------------------------|-------------------|--------------|-------------------|------------|----------------------|----------------------|-------------------|-------------|
|                                                          | Allergic rhinitis (INR)          | Allergic rhinitis (USD) | Asthma (INR)      | Asthma (USD) | COPD (INR)        | COPD (USD) | Rhinosinusitis (INR) | Rhinosinusitis (USD) | Total (INR)       | Total (USD) |
| General practitioner/family physician visits             |                                  |                         |                   |              |                   |            |                      |                      |                   |             |
| Nmiss                                                    | 2                                | 2                       | 5                 | 5            | 0                 | 0          | 0                    | 0                    | 7                 | 7           |
| n                                                        | 297                              | 297                     | 419               | 419          | 232               | 232        | 45                   | 45                   | 993               | 993         |
| Total cost                                               | 50,800                           | 832                     | 91,400            | 1498         | 71,600            | 1173       | 14,200               | 233                  | 228,000           | 3736        |
| Mean cost per patient (SD)                               | 171 (161)                        | 3 (3)                   | 218 (245)         | 4 (4)        | 309 (303)         | 5 (5)      | 316 (157)            | 5 (3)                | 230 (241)         | 4 (4)       |
| Median cost per patient (min, max)                       | 200 (0, 1000)                    | 3 (0, 16)               | 200 (0, 1200)     | 3 (0, 20)    | 200 (0, 1400)     | 3 (0, 23)  | 200 (200, 800)       | 3 (3, 13)            | 200 (0, 1400)     | 3 (0, 23)   |
| Medical specialist visits                                |                                  |                         |                   |              |                   |            |                      |                      |                   |             |
| Nmiss                                                    | 0                                | 0                       | 23                | 23           | 21                | 21         | 0                    | 0                    | 44                | 44          |
| n                                                        | 299                              | 299                     | 401               | 401          | 211               | 211        | 45                   | 45                   | 956               | 956         |
| Total cost                                               | 74,800                           | 1226                    | 124,300           | 2037         | 45,650            | 748        | 2200                 | 36                   | 246,950           | 4047        |
| Mean cost per patient (SD)                               | 250 (561)                        | 4 (9)                   | 310 (646)         | 5 (11)       | 216 (402)         | 4 (7)      | 49 (197)             | 1 (3)                | 258 (561)         | 4 (9)       |
| Median cost per patient (min, max)                       | 0 (0, 8250)                      | 0 (0, 135)              | 0 (0, 11,000)     | 0 (0, 180)   | 0 (0, 2750)       | 0 (0, 45)  | 0 (0, 1100)          | 0 (0, 18)            | 0 (0, 11,000)     | 0 (0, 180)  |
| Pharmacist visits                                        |                                  |                         |                   |              |                   |            |                      |                      |                   |             |
| Nmiss                                                    | 2                                | 2                       | 28                | 28           | 21                | 21         | 0                    | 0                    | 51                | 51          |
| n                                                        | 297                              | 297                     | 396               | 396          | 211               | 211        | 45                   | 45                   | 949               | 949         |
| Total cost                                               | 0                                | 0                       | 0                 | 0            | 0                 | 0          | 0                    | 0                    | 0                 | 0           |
| Mean cost per patient (SD)                               | 0 (0)                            | 0 (0)                   | 0 (0)             | 0 (0)        | 0 (0)             | 0 (0)      | 0 (0)                | 0 (0)                | 0 (0)             | 0 (0)       |
| Median cost per patient (min, max)                       | 0 (0, 0)                         | 0 (0, 0)                | 0 (0, 0)          | 0 (0, 0)     | 0 (0, 0)          | 0 (0, 0)   | 0 (0, 0)             | 0 (0, 0)             | 0 (0, 0)          | 0 (0, 0)    |
| Emergency department visits                              |                                  |                         |                   |              |                   |            |                      |                      |                   |             |
| Nmiss                                                    | 2                                | 2                       | 28                | 28           | 21                | 21         | 0                    | 0                    | 51                | 51          |
| n                                                        | 297                              | 297                     | 396               | 396          | 211               | 211        | 45                   | 45                   | 949               | 949         |
| Total cost                                               | 0                                | 0                       | 11,000            | 180          | 22,000            | 360        | 0                    | 0                    | 33,000            | 541         |
| Mean cost per patient (SD)                               | 0 (0)                            | 0 (0)                   | 28 (553)          | 0 (9)        | 104 (930)         | 2 (15)     | 0 (0)                | 0 (0)                | 35 (566)          | 1 (9)       |
| Median cost per patient (min, max)                       | 0 (0, 0)                         | 0 (0, 0)                | 0 (0, 11,000)     | 0 (0, 180)   | 0 (0, 11,000)     | 0 (0, 180) | 0 (0, 0)             | 0 (0, 0)             | 0 (0, 11,000)     | 0 (0, 180)  |
| Hospital admissions                                      |                                  |                         |                   |              |                   |            |                      |                      |                   |             |
| Nmiss                                                    | 2                                | 2                       | 28                | 28           | 21                | 21         | 0                    | 0                    | 51                | 51          |
| n                                                        | 297                              | 297                     | 396               | 396          | 211               | 211        | 45                   | 45                   | 949               | 949         |
| Total cost                                               | 0                                | 0                       | 54,600            | 895          | 58,800            | 963        | 0                    | 0                    | 113,400           | 1858        |
| Mean cost per patient (SD)                               | 0 (0)                            | 0 (0)                   | 138 (1312)        | 2 (22)       | 279 (1330)        | 5 (22)     | 0 (0)                | 0 (0)                | 119 (1059)        | 2 (17)      |
| Median cost per patient (min, max)                       | 0 (0, 0)                         | 0 (0, 0)                | 0 (0, 21,000)     | 0 (0, 344)   | 0 (0, 12,600)     | 0 (0, 206) | 0 (0, 0)             | 0 (0, 0)             | 0 (0, 21,000)     | 0 (0, 344)  |
| Alternative and traditional medicine practitioner visits |                                  |                         |                   |              |                   |            |                      |                      |                   |             |
| Nmiss                                                    | 2                                | 2                       | 28                | 28           | 21                | 21         | 0                    | 0                    | 51                | 51          |
| n                                                        | 297                              | 297                     | 396               | 396          | 211               | 211        | 45                   | 45                   | 949               | 949         |
| Total cost                                               | 0                                | 0                       | 0                 | 0            | 0                 | 0          | 0                    | 0                    | 0                 | 0           |
| Mean cost per patient (SD)                               | 0 (0)                            | 0 (0)                   | 0 (0)             | 0 (0)        | 0 (0)             | 0 (0)      | 0 (0)                | 0 (0)                | 0 (0)             | 0 (0)       |
| Median cost per patient (min, max)                       | 0 (0, 0)                         | 0 (0, 0)                | 0 (0, 0)          | 0 (0, 0)     | 0 (0, 0)          | 0 (0, 0)   | 0 (0, 0)             | 0 (0, 0)             | 0 (0, 0)          | 0 (0, 0)    |
| Total HCP cost <sup>a</sup>                              |                                  |                         |                   |              |                   |            |                      |                      |                   |             |
| Nmiss                                                    | 0                                | 0                       | 0                 | 0            | 0                 | 0          | 0                    | 0                    | 0                 | 0           |
| n                                                        | 299                              | 299                     | 424               | 424          | 232               | 232        | 45                   | 45                   | 1000              | 1000        |
| Total cost                                               | 125,600                          | 2058                    | 281,300           | 4609         | 198,050           | 3245       | 16,400               | 269                  | 621,350           | 10,181      |
| Mean cost per patient (SD)                               | 420 (530)                        | 7 (9)                   | 663 (1641)        | 11 (27)      | 854 (1899)        | 14 (31)    | 364 (249)            | 6 (4)                | 621 (1445)        | 10 (24)     |
| Median cost per patient (min, max)                       | 200 (200, 8450)                  | 3 (3, 138)              | 550 (200, 21,200) | 9 (3, 347)   | 400 (200, 18,050) | 7 (3, 296) | 200 (200, 1300)      | 3 (3, 21)            | 400 (200, 21,200) | 7 (3, 347)  |

<sup>a</sup>Total HCP cost for a patient is the sum of all nonmissing amounts. COPD: Chronic obstructive pulmonary condition, Min: Minimum, Max: Maximum, SD: Standard deviation, HCP: Healthcare professionals
